# Supplementary material for: Photodegradation of Rhodamine B over a novel photocatalyst of feather keratin decorated CdS under visible light irradiation
Source: Royal Society of Chemistry journal article supplement (doi:10.1039/c5nj00987a), 2015-01-01
Supplement: c5nj00987a1.pdf [file c5nj00987a1.pdf]

## **Photodegradation of Rhodamine B over a novel photocatalyst of feather keratin decorated CdS under visible light irradiation**

Qizhao Wang,<sup>\*[a]</sup> Juhong Lian,<sup>[a]</sup> Qiong Ma,<sup>[a]</sup> Yan Bai,<sup>[a]</sup> Jinhui Tong,<sup>[a]</sup> Junbo Zhong,<sup>[c]</sup>

Rongmin Wang,<sup>[a]</sup> Haohao Huang,<sup>\*[b]</sup> and Bitao Su<sup>[a]</sup>

*<sup>a</sup>College of Chemistry and Chemical Engineering, Key Laboratory of Eco-Environment-Related Polymer Materials, Ministry of Education of China, Northwest Normal University, Lanzhou 730070, China*

*<sup>b</sup>College of Materials Science and Engineering, South China University of Technology, Guangzhou, 510640, China*

*<sup>c</sup>Key Laboratory of Green Catalysis of Sichuan Institutes of High Education Institutes of Sichuan, College of Chemistry and Pharmaceutical Engineering, Sichuan University of Science and Engineering, Zigong, 643000, China*

*\*Corresponding author. Tel: +86 931 7972677; Fax: +86 931 7975521.*

E-mail addresses: [wangqizhao@163.com](mailto:wangqizhao@163.com); qizhaosjtu@gmail.com(Q. Wang)

scuthhh@hotmail.com (H. Huang)

New Journal of Chemistry

## Supplementary

### Additional Figures and Discussions

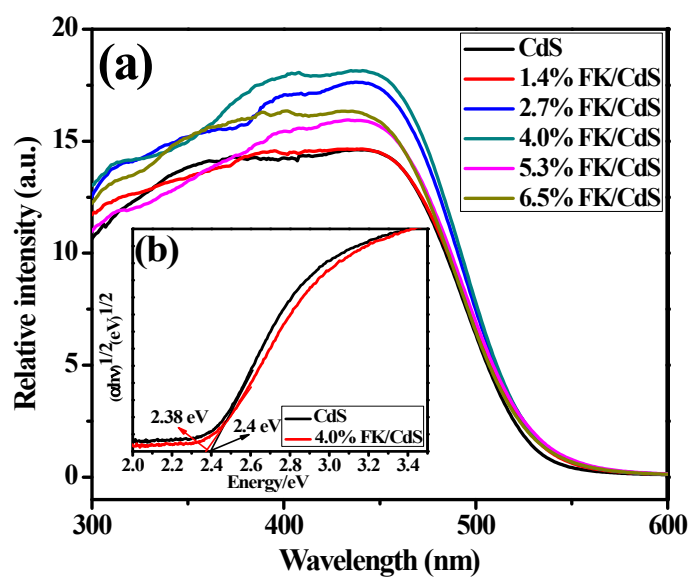

**Figure S1.** UV-vis diffuse reflectance spectra of the samples with various amounts of FK (a); band gap evaluation from the plots of  $(\alpha h\nu)^{1/2}$  versus photon energy ( $h\nu$ ) (b).

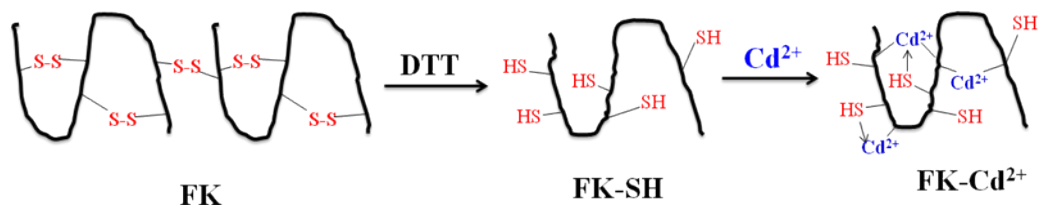

**Figure S2.** The structure of FK-Cd(II) complex

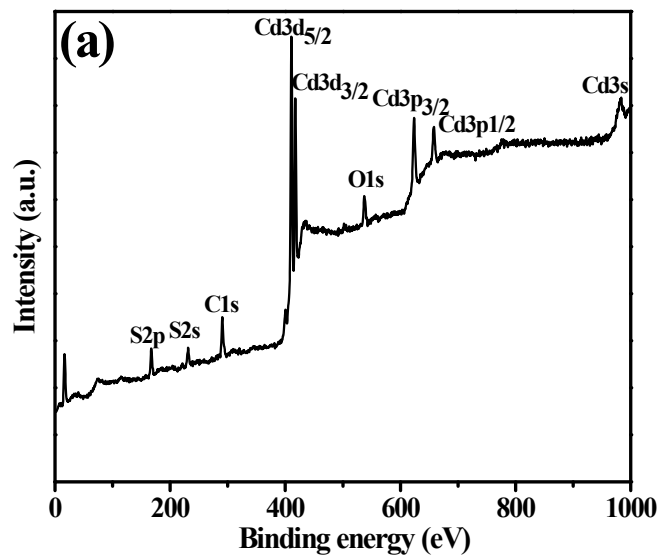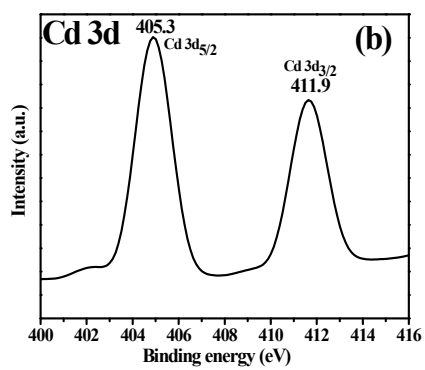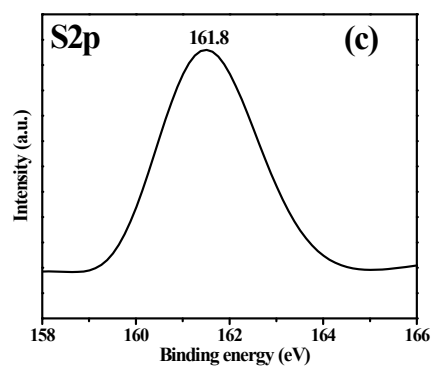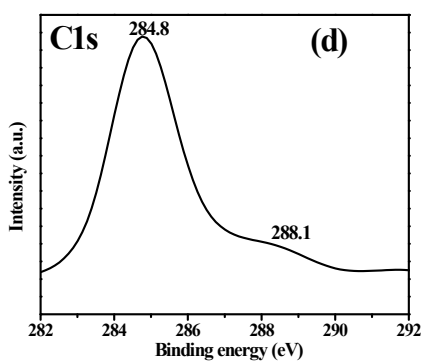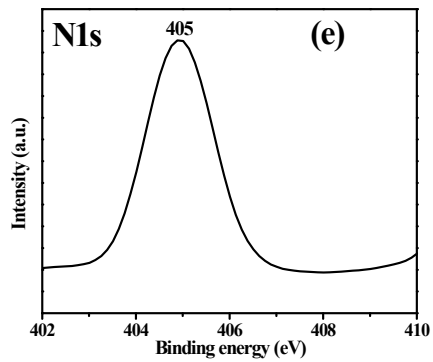

**Figure S3.** XPS of 4.0% FK/CdS photocatalyst (a) survey spectra; and high-resolution XPS spectra of: (b) Cd 3d; (c) S 2p; (d) C 1s; and (e) N 1s.

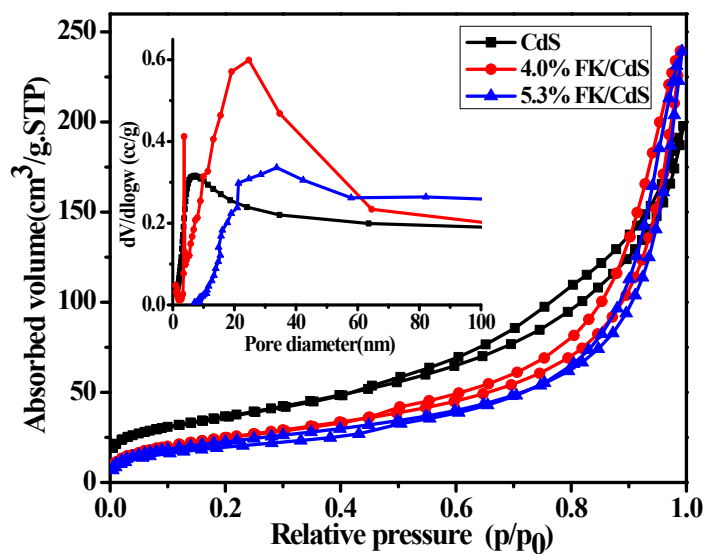

**Figure S4.** Nitrogen adsorption–desorption isotherms and the corresponding pore-size distribution curves (inset) for the CdS, 4.0% FK/CdS and 5.3% FK/CdS samples.
